# Supplementary material
Source: publisher figshare collection journal article supplement (https://tandf.figshare.com/ndownloader/files/14366504)
Supplement: Supplementary file 1 [file 14366504]

## SUPPLEMENTARY MATERIAL

### A new sesquiterpenoid glycoside from *Saussurea involucrata*

Shizhou Qi<sup>a</sup>, Yiren Yang<sup>a</sup>, Xiaoyan Xian<sup>a</sup>, Xianzhe Li<sup>a</sup>, Huiyuan Gao<sup>a\*</sup>

<sup>a</sup>*School of Traditional Chinese Materia Medica, Shenyang Pharmaceutical University, Shenyang 110016, People's Republic of China.*

\*Corresponding author. Tel: +862423986481. Fax: +862423986460. E-mail: [sypugaohy@163.com](mailto:sypugaohy@163.com). School of Traditional Chinese Materia Medica, Shenyang Pharmaceutical University.

#### Abstract

*Saussurea involucrata*, known for the abundant bioactive components, is a precious traditional Chinese medicine. In this study, a novel guaiane sesquiterpenoid glycoside named (1*R*, 5*R*, 6*R*, 7*R*, 8*S*, 11*S*)-11, 13-dihydrodehydrocostuslactone-8-*O*-6'-2''(*E*)-butenoyl- $\beta$ -D-glucopyranoside (**1**), together with seven known compounds (**2-8**) were isolated from the dried aerial part of *S. involucrata*. Their structures were elucidated by spectroscopic and physico-chemical analyses. The antioxidant and anti-inflammatory activities of compound **1** were investigated. And compound **1** showed weak radical scavenging activity and low inhibitory activity on nitric oxide (NO) production.

Keywords: *Saussurea involucrata*; sesquiterpenoid glycoside; antioxidant; anti-inflammatory

## List of supplementary materials

**Table S1.**  $^1\text{H}$ -NMR,  $^{13}\text{C}$ -NMR, HMBC and NOESY spectral data of compound **1**

(DMSO- $d_6$ ,  $\delta$  in ppm,  $J$  in Hz)

**Figure S1.** The key HMBC correlations of compound **1**

**Figure S2.** The key NOESY correlations of compound **1**

**Figure S3.** The  $^1\text{H}$ -NMR spectrum of compound **1** (DMSO- $d_6$ , 600 MHz)

**Figure S4.** The  $^1\text{H}$ -NMR spectrum of compound **1** (DMSO- $d_6$ , 600 MHz)

**Figure S5.** The  $^1\text{H}$ -NMR spectrum of compound **1** (DMSO- $d_6$ , 600 MHz)

**Figure S6.** The  $^{13}\text{C}$ -NMR spectrum of compound **1** (DMSO- $d_6$ , 125 MHz)

**Figure S7.** The HSQC spectrum of compound **1** (DMSO- $d_6$ , 600 MHz)

**Figure S8.** The HMBC spectrum of compound **1** (DMSO- $d_6$ , 600 MHz)

**Figure S9.** The NOESY spectrum of compound **1** (DMSO- $d_6$ , 600 MHz)

**Figure S10.** The ECD cotton effect of compound **1a**

**Figure S11.** The HR-ESI-MS spectrum of compound **1**

**Figure S12.** The IR spectrum of compound **1**

**Table S1**

<sup>1</sup>H-NMR, <sup>13</sup>C-NMR, HMBC and NOESY spectral data of compound **1** (DMSO-*d*<sub>6</sub>,  $\delta$  in ppm, *J* in Hz)

| Position | $\delta_{\text{C}}$ | $\delta_{\text{H}}$                                                            | HMBC(H→C)               | NOESY   |
|----------|---------------------|--------------------------------------------------------------------------------|-------------------------|---------|
| 1        | 46.5                | 2.88 (1H, dd, <i>J</i> = 13.8, 7.8 Hz)                                         | C-7                     | H-7     |
| 2        | 31.9                | 2.38 (1H, m), 2.44 (1H, m)                                                     | C-4                     |         |
| 3        | 29.4                | 1.74 (1H, m), 1.82 (1H, m)                                                     | C-1                     |         |
| 4        | 152.2               | -                                                                              | -                       |         |
| 5        | 52.2                | 2.77 (1H, br t, <i>J</i> = 9.6 Hz)                                             | C-1, 4, 6, 10, 15       |         |
| 6        | 79.3                | 3.91 (1H, t, <i>J</i> = 9.6 Hz)                                                | C-4, 7, 8               | H-8     |
| 7        | 53.0                | 2.19 (1H, dd, <i>J</i> = 13.2, 9.6 Hz)                                         | C-1, 5, 6, 8, 9, 11, 13 | H-1, 5  |
| 8        | 83.3                | 3.65 (1H, td, <i>J</i> = 9.0, 5.4 Hz)                                          | C-11                    | H-6, 11 |
| 9        | 44.1                | 2.18 (1H, m), 2.70 (1H, m)                                                     | C-1, 6, 8, 11, 14       |         |
| 10       | 145.4               | -                                                                              | -                       |         |
| 11       | 40.2                | 2.67 (1H, dd, <i>J</i> = 10.8, 7.2 Hz)                                         | C-7, 12, 13             | H-6     |
| 12       | 178.8               | -                                                                              | -                       |         |
| 13       | 16.1                | 1.28 (3H, d, <i>J</i> = 7.2 Hz)                                                | C-7, 11, 12             |         |
| 14       | 113.6               | 4.78 (1H, br s), 4.86 (1H, br s)                                               | C-9, 10, 11             |         |
| 15       | 108.6               | 4.95 (1H, br s), 5.02 (1H, br s)                                               | C-2, 7                  |         |
| 1'       | 103.7               | 4.35 (1H, d, <i>J</i> = 8.4 Hz)                                                | C-8, 1''                |         |
| 2'       | 76.8                | 3.17 (1H, t, <i>J</i> = 8.4 Hz)                                                | C-3', 4', 5'            |         |
| 3'       | 73.6                | 3.40 (1H, t, <i>J</i> = 8.4 Hz)                                                | C-6'                    |         |
| 4'       | 70.3                | 3.06 (1H, t, <i>J</i> = 9.0 Hz)                                                | C-2', 3', 5', 6'        |         |
| 5'       | 73.7                | 2.99 (1H, m)                                                                   | C-1'                    |         |
| 6'       | 63.5                | 4.10 (1H, dd, <i>J</i> = 11.4, 7.8 Hz), 4.38 (1H, dd, <i>J</i> = 12.0, 1.8 Hz) | C-3', 5', 1''           |         |
| 1''      | 165.4               | -                                                                              | -                       |         |
| 2''      | 122.2               | 5.86 (1H, dd, <i>J</i> = 15.6, 1.8 Hz)                                         | C-1'', 4''              |         |
| 3''      | 145.3               | 6.88 (1H, m)                                                                   |                         |         |

|    |      |                                                                         |          |
|----|------|-------------------------------------------------------------------------|----------|
| 4" | 17.7 | 1.82 (3H, d, $J = 7.2$ Hz)                                              | C-2", 3" |
| OH |      | 5.21 (1H, d, $J = 5.4$ Hz), 5.09 (1H, s),<br>5.05 (1H, d, $J = 6.0$ Hz) |          |

---

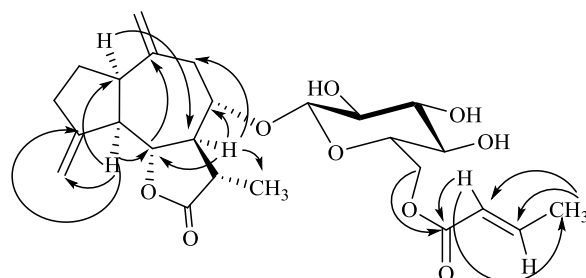

**Figure S1.** The key HMBC correlations of compound **1**.

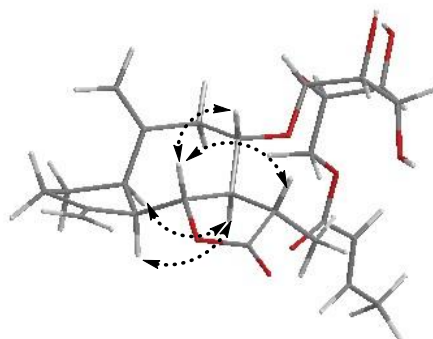

**Figure S2.** The key NOESY correlations of compound **1**.

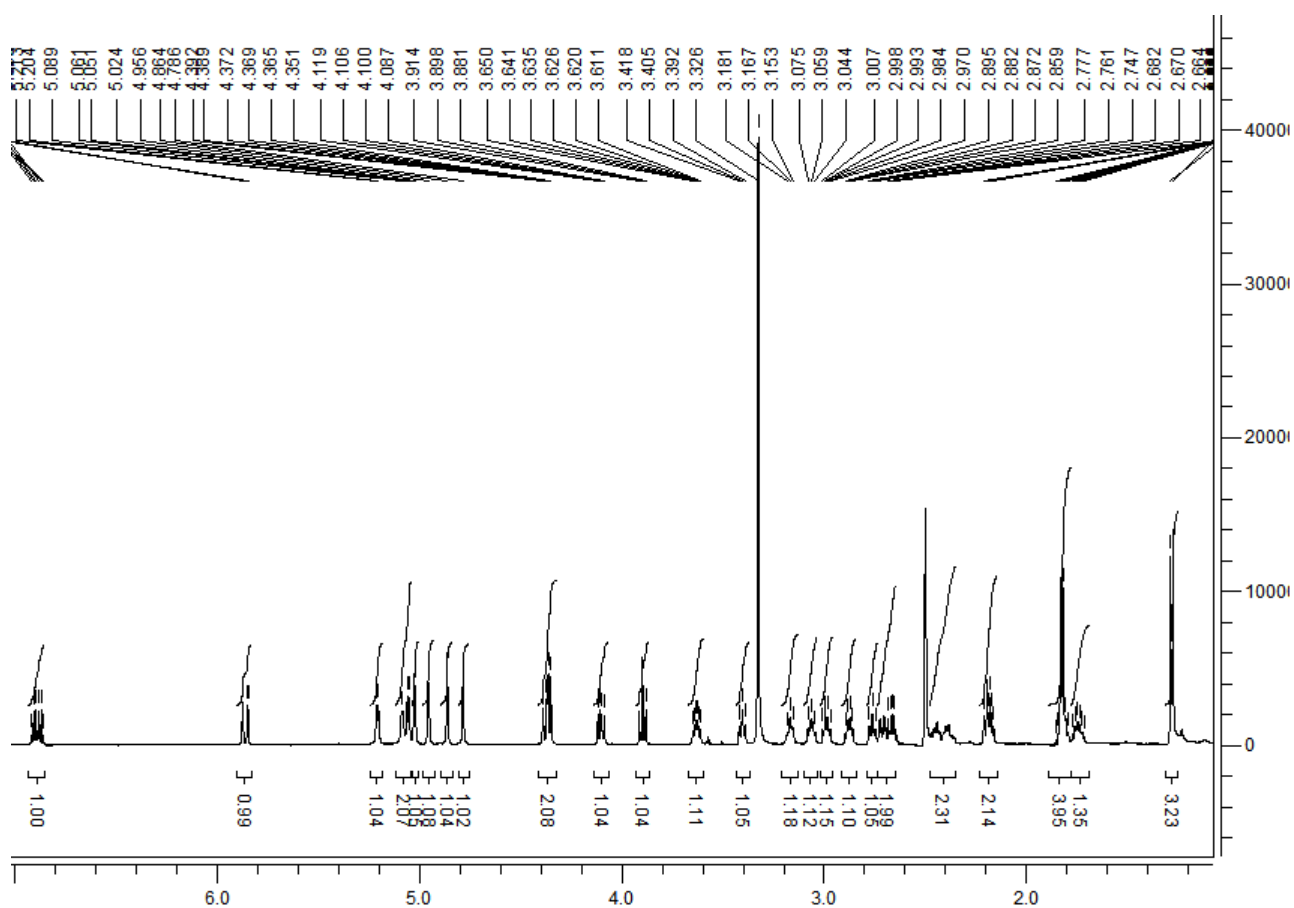

**Figure S3.** The  $^1\text{H}$ -NMR spectrum of compound **1** ( $\text{DMSO-}d_6$ , 600 MHz)

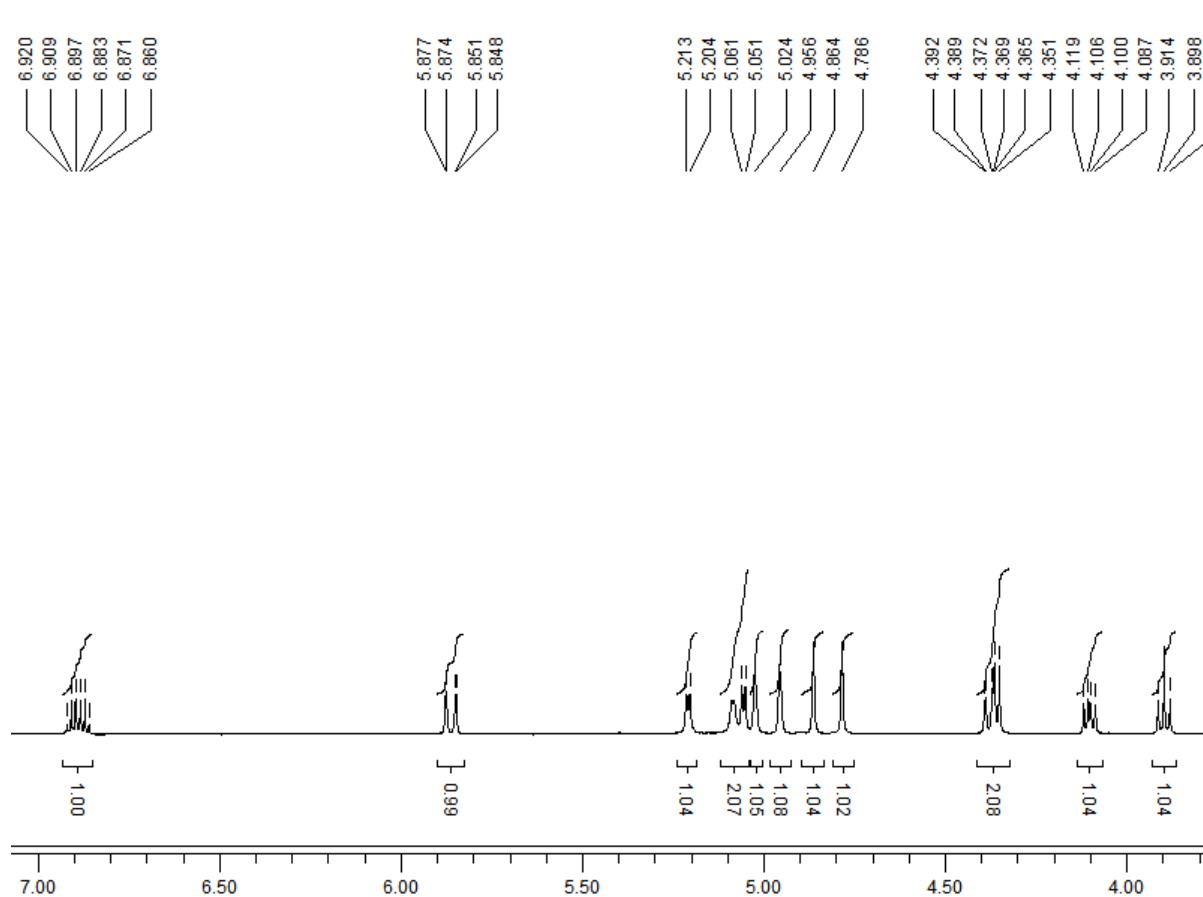

**Figure S4.** The <sup>1</sup>H-NMR spectrum of compound **1** (DMSO-*d*<sub>6</sub>, 600 MHz)

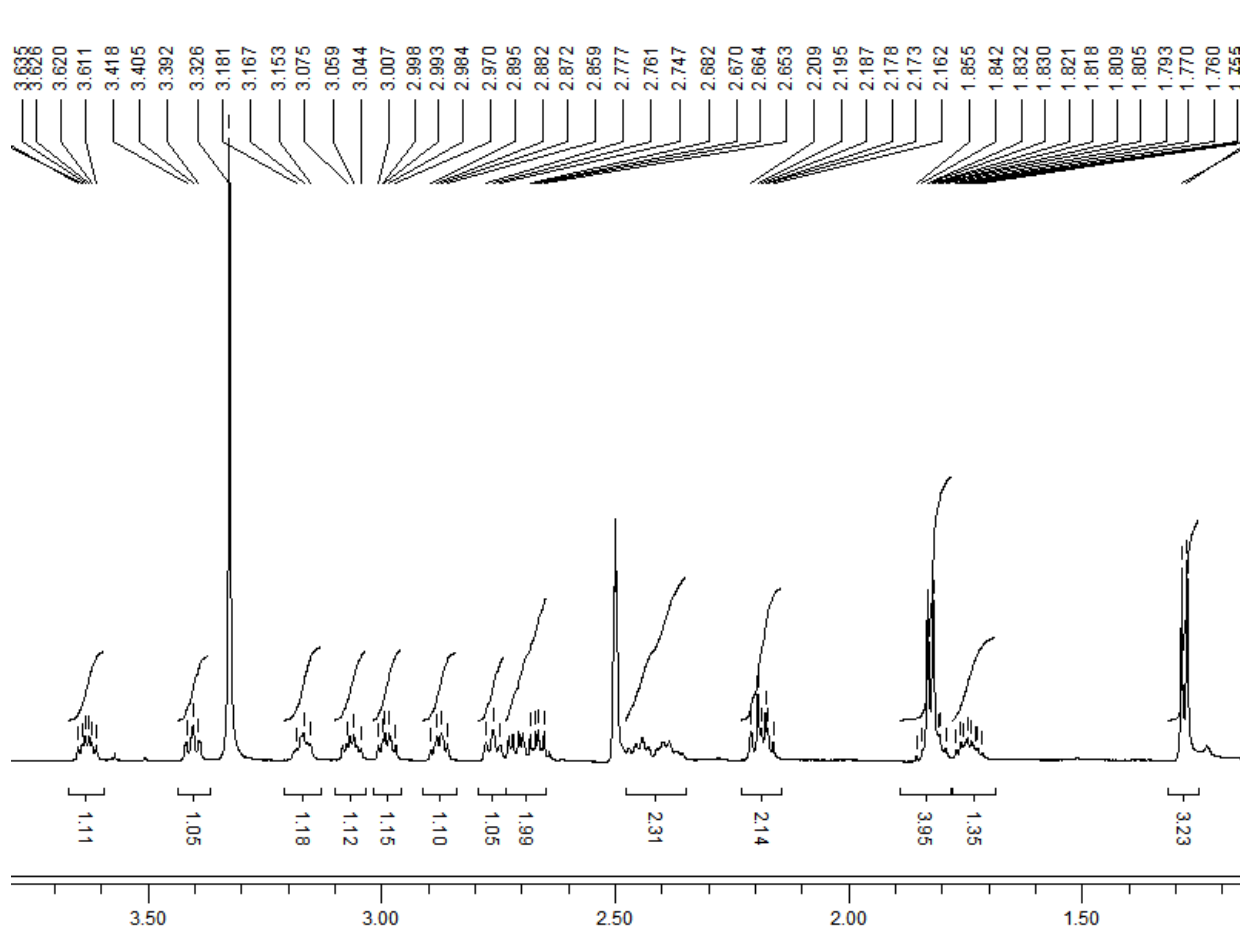

**Figure S5.** The  $^1\text{H}$ -NMR spectrum of compound **1** ( $\text{DMSO-}d_6$ , 600 MHz)

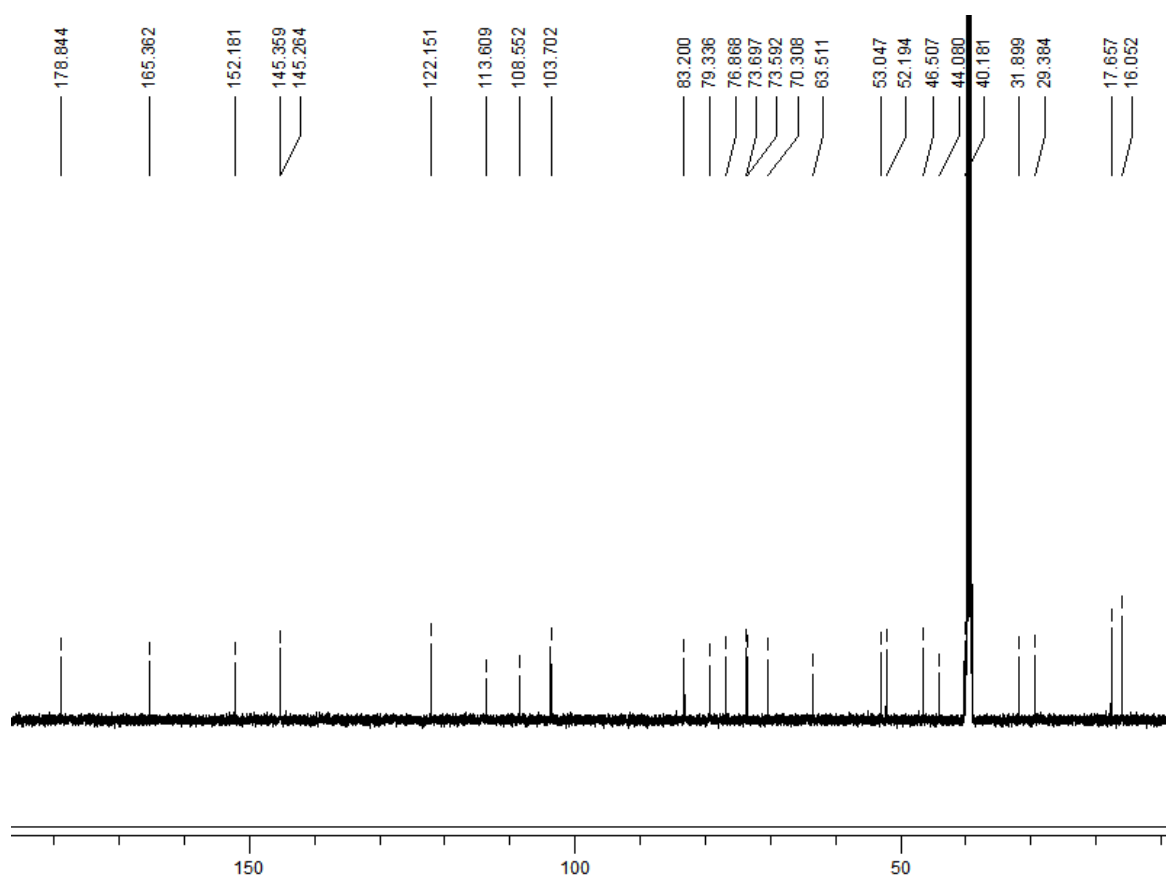

**Figure S6.** The  $^{13}\text{C}$ -NMR spectrum of compound **1** ( $\text{DMSO-}d_6$ , 150 MHz)



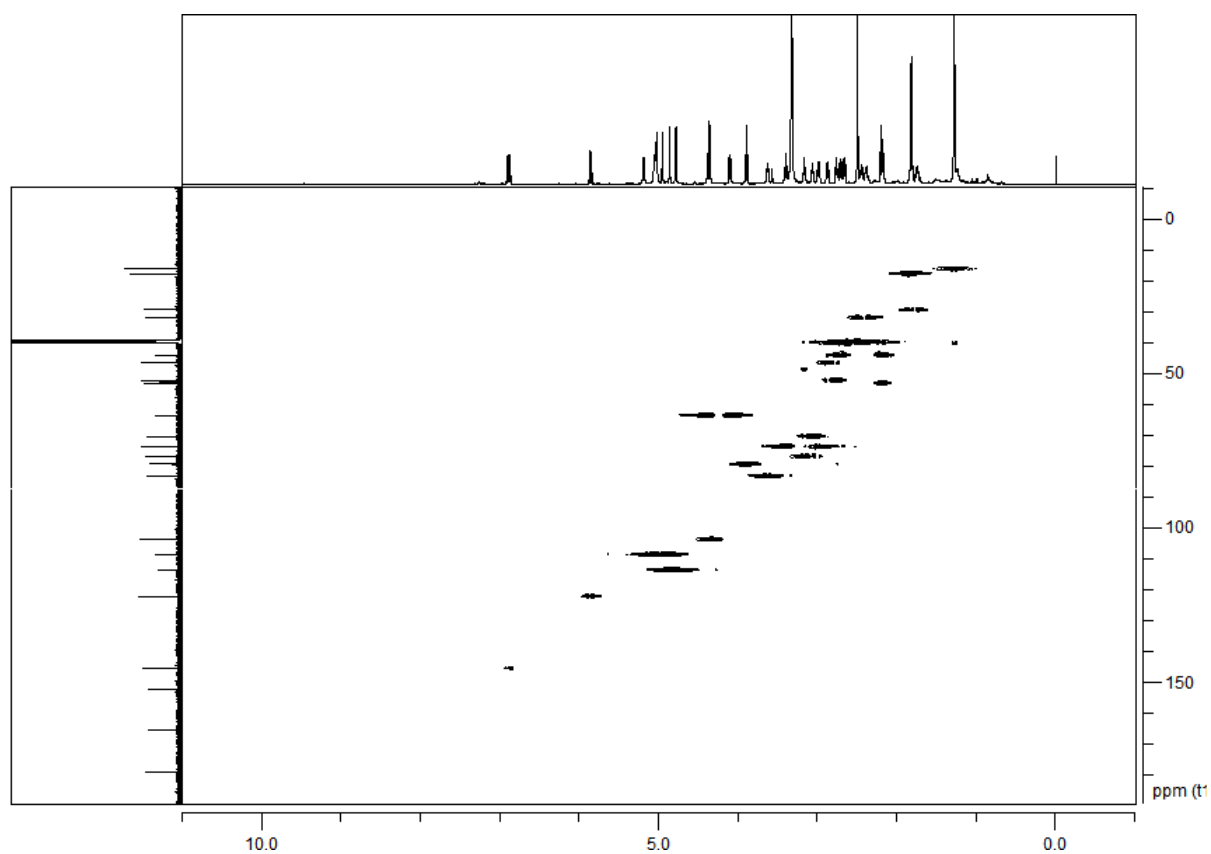

**Figure S7.** The HSQC spectrum of compound **1** (DMSO- $d_6$ , 600 MHz)

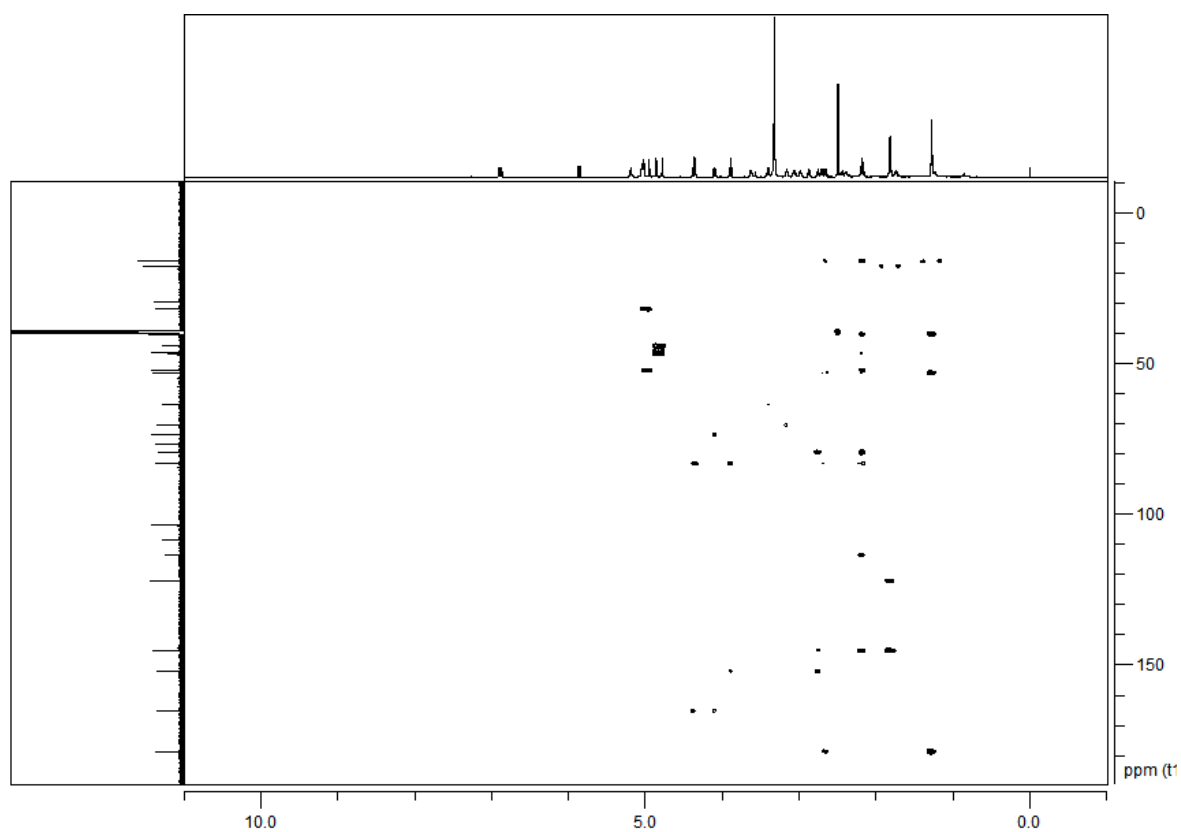

**Figure S8.** The HMBC spectrum of compound **1** (DMSO- $d_6$ , 600 MHz)

AV-600-NOESY  
Sample:XXY-1

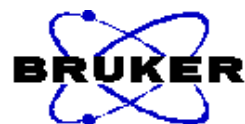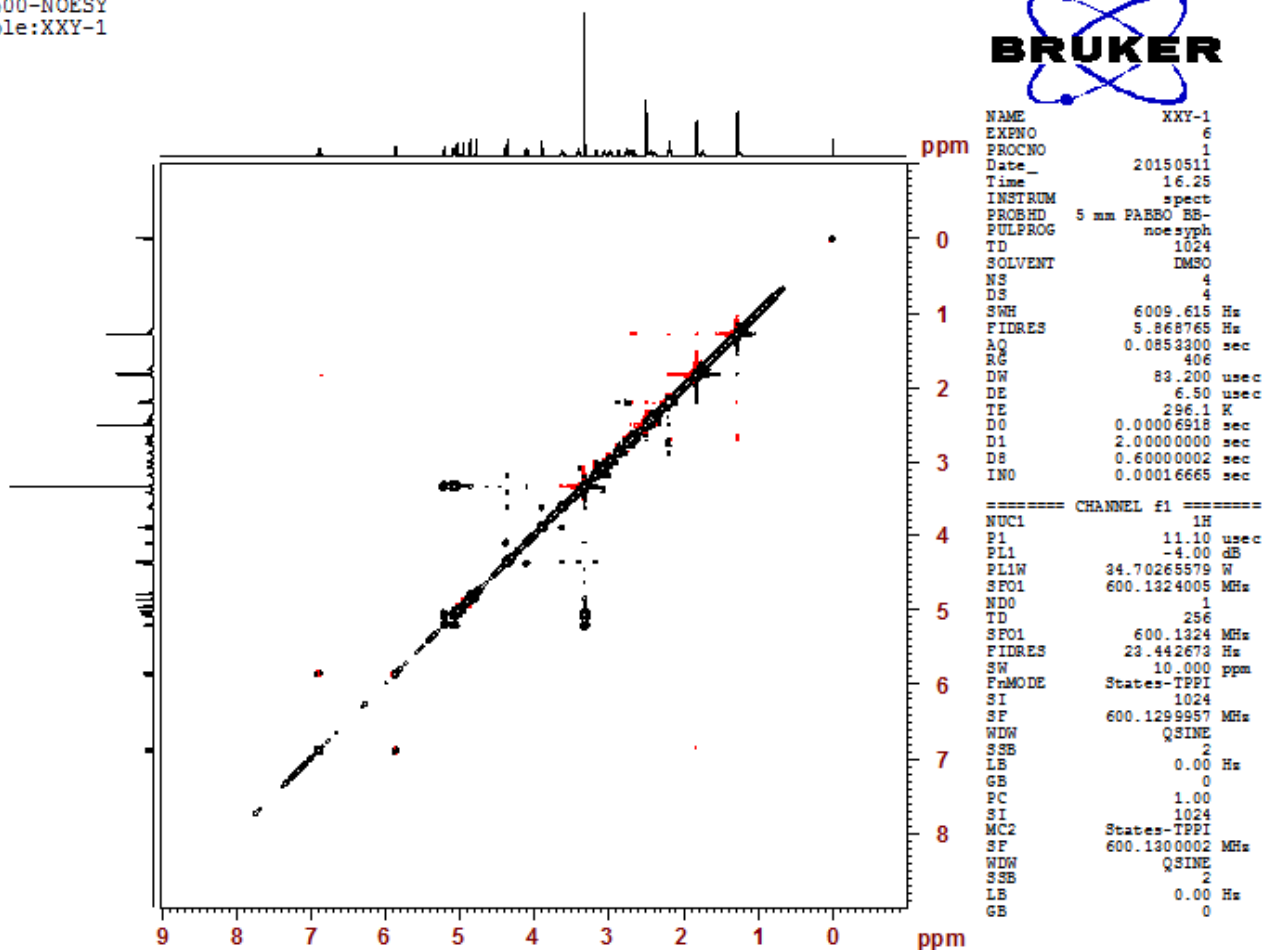

**Figure S9.** The NOESY spectrum of compound **1** (DMSO- $d_6$ , 600 MHz)

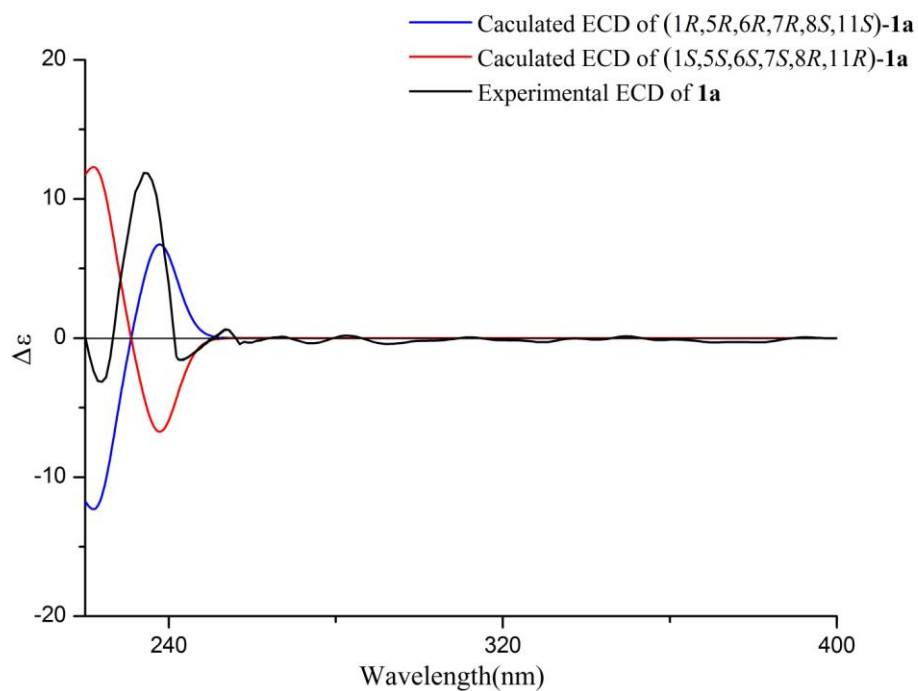

**Figure S10.** The ECD cotton effect of compound **1a**

Comment

#### Acquisition Parameter

|             |          |                       |           |                  |           |
|-------------|----------|-----------------------|-----------|------------------|-----------|
| Source Type | ESI      | Ion Polarity          | Positive  | Set Nebulizer    | 0.3 Bar   |
| Focus       | Active   | Set Capillary         | 4500 V    | Set Dry Heater   | 180 °C    |
| Scan Begin  | 50 m/z   | Set End Plate Offset  | -500 V    | Set Dry Gas      | 4.0 l/min |
| Scan End    | 3000 m/z | Set Collision Cell RF | 600.0 Vpp | Set Divert Valve | Source    |

#### Generate Molecular Formula Parameter

|                  |  |                        |         |
|------------------|--|------------------------|---------|
| Formula, min.    |  | Tolerance              | Charge  |
| Formula, max.    |  | Minimum                | Maximum |
| Measured m/z     |  | Electron Configuration |         |
| Check Valence    |  | Minimum                | Maximum |
| Nitrogen Rule    |  |                        |         |
| Filter H/C Ratio |  |                        |         |
| Estimate Carbon  |  |                        |         |

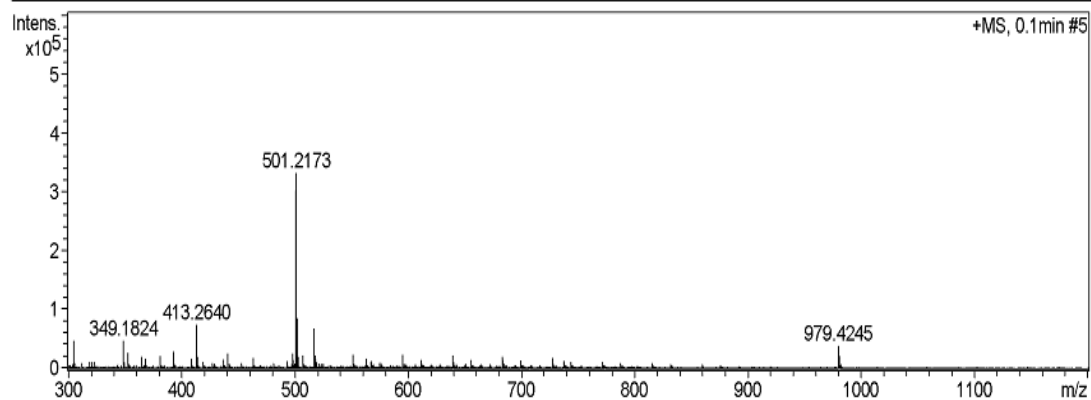

**Figure S11.** The HR-ESI-MS spectrum of compound **1**

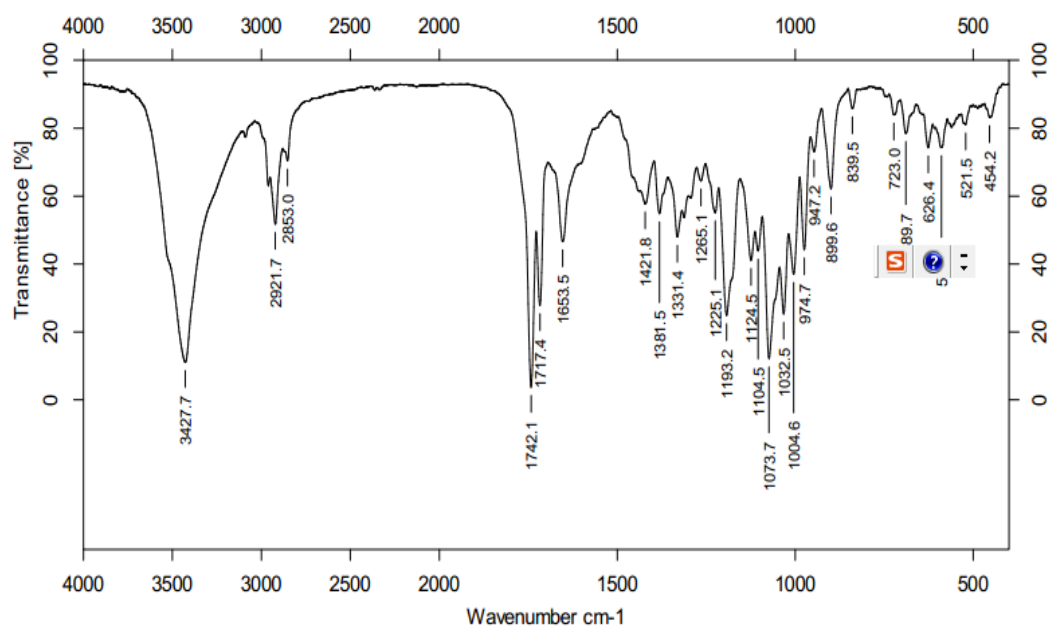

**Figure S12.** The IR spectrum of compound **1**

## Reference

Wang XL, Gesang SL, Jiao W, Liao X, Ding LS. 2007. Two new sesquiterpenoid glucosides from the aerial parts of *Saussurea involucrate*. J Integr Plant Biol. 49: 609-614.

Xiao W, Li X, Li N, Bolati M, Wang XJ, Jia XG, Zhao, YQ. 2011. Sesquiterpene lactones from *Saussurea involucrata*. 82:983-987.
